# Supplementary material for: The role of post-translational modification in the photoregulation of Fe-type nitrile hydrataseElectronic supplementary information (ESI) available: Selected structural parameters of the experimentally observed NHase active site and DFT-optimised models 1 and 2, and graphical MO representations of the calculated INDO/S spectroscopic transitions for the models discussed. See http://www.rsc.org/suppdata/cc/b2/b207027h/
Source: Royal Society of Chemistry journal article supplement (doi:10.1039/b207027h), 2002-09-19
Supplement: b207027h.doc [file b207027h.doc]

Electronic Supplementary Information

The role of post-translational modification in the photoregulation of Fe-type nitrile hydratase [[1]](#footnote-2)†

Shannon N. Greene, Christopher H. Chang and Nigel G. J. Richards*

Department of Chemistry, University of Florida, Gainesville, FL 32611

**Table S1** Fe-ligand bond lengths and bond angles for the nitrosyl bound NHase active site in the crystal structure and the BLYP-optimised structures for models **1** and **2**.

| **Property** | Crystal | **Model 1** | **Model 2** |
| --- | --- | --- | --- |
| Fe-S1 | 2.33 Å | 2.32 Å | 2.43 Å |
| Fe-S2 | 2.26 Å | 2.29 Å | 2.41 Å |
| Fe-S3 | 2.30 Å | 2.33 Å | 2.40 Å |
| Fe-N1 | 1.65 Å | 1.63 Å | 1.64 Å |
| Fe-N2 | 2.05 Å | 1.96 Å | 1.93 Å |
| Fe-N3 | 2.09 Å | 1.95 Å | 1.97 Å |
| N1-O1 | 1.33 Å | 1.15 Å | 1.64 Å |
| S1-O2 | 1.51 Å | 1.69 Å | - |
| S2-O3 | 1.51 Å | 1.52 Å | - |
| S2-O4 | 1.41 Å | 1.52 Å | - |
| O5-O1 | 3.31 Å | 3.34 Å | 3.63 Å |
| Fe-N1-O1 | 158.1o | 169.4o | 169.4o |
| S1-Fe-N3 | 171.1o | 165.9o | 172.8o |
| S2-Fe-N2 | 175.7o | 176.2o | 173.3o |
| S3-Fe-N1 | 172.3o | 166.8o | 169.4o |

**Fig. S1** Graphical representations of the electronic transitions calculated for the photoexcitations of the NHase active site model **1**. (A) 380 nm, (B) 288 nm. The phases of the initial (left) and final (right) MOs involved in promotion of the electron are shown in blue/green and red/yellow, respectively. Hydrogen atoms have been omitted for clarity.

(A)


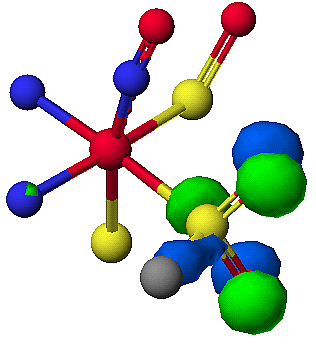

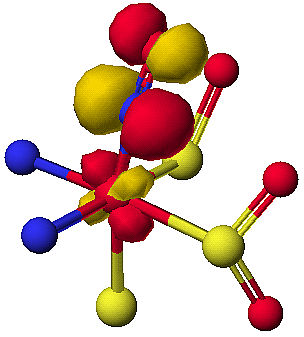

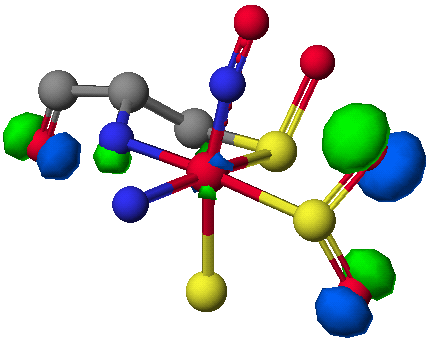

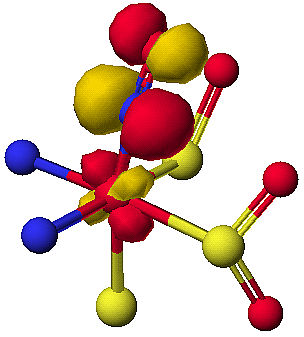


(B)

**Fig.** **S2** Graphical representations of the electronic transitions calculated for the photoexcitations of the NHase active site model **2**. (A) 350 nm, (B) 285 nm. The phases of the initial (left) and final (right) MOs involved in promotion of the electron are shown in blue/green and red/yellow, respectively. Hydrogen atoms have been omitted for clarity.


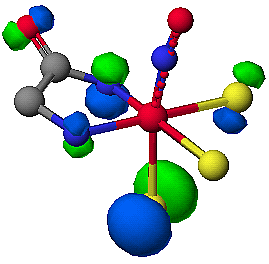

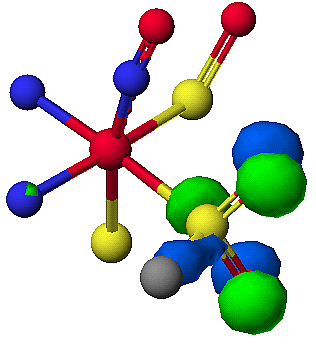

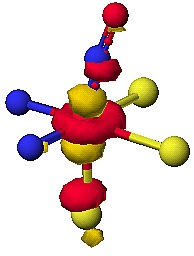

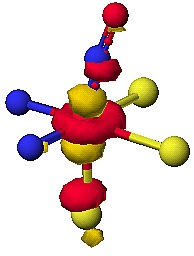


(A)

(B)

1. † This work was supported by the National Science Foundation (CHE-0079008) [↑](#footnote-ref-2)
